# Supplementary material for: Effects of aerobic exercise and resistance exercise on physical indexes and cardiovascular risk factors in obese and overweight school-age children: A systematic review and meta-analysis
Source: PLoS One. 2021 Sep 20;16(9):e0257150. doi: 10.1371/journal.pone.0257150 (PMC8452003; doi:10.1371/journal.pone.0257150)
Supplement: S1 File — (XLSX) [file pone.0257150.s002.xlsx]

## Sheet: doi-part-classify-all(1)(1)(1)
		筛选
Exercise training modulates the gut microbiota profile and impairs inflammatory signaling pathways in obese children	doi: 10.1038/s12276-020-0459-0.	No
Impact of exercise in high-humidity on heart rate variability and salivary oxidative stress in obese and lightweight asthmatic children	doi: 10.23736/S0022-4707.20.10312-8.	No
Exergaming and Aquatic Exercises Affect Lung Function and Weight Loss in Obese Children	doi: 10.1055/a-1289-9307.	No
Effects of exercise and diet intervention on appetite-regulating hormones associated with miRNAs in obese children	doi: 10.1007/s40519-020-00869-9.	No
How do diet and exercise programmes affect the cardiovascular risk profiles of obese children?	doi: 10.1017/S1047951118002093.	No
Four months of a school-based exercise program improved aerobic fitness and clinical outcomes in a Low-SES population of normal weight and overweight/obese children with asthma	doi: 10.3389/fped.2018.00380.	No
Effects of Dietary induced weight loss on exercise-induced bronchoconstriction in overweight and obese children	doi: 10.1002/ppul.22932.	No
Effects of a 1-year exercise and lifestyle intervention on irisin, adipokines, and inflammatory markers in obese children	doi: 10.1002/oby.20739.	No
Combined food intake and exercise unmask different hormonal responses in lean and obese children	doi: 10.1139/apnm-2012-0246.	No
Biophysical properties of the aorta and left ventricle and exercise capacity in obese children	doi: 10.1016/j.amjcard.2012.05.019.	No
Substrate utilization during submaximal exercise in children with a severely obese parent	doi: 10.1186/1743-7075-9-38.	No
Effect of time interval between food intake and exercise on substrate oxidation during exercise in obese and lean children	doi: 10.1016/j.clnu.2011.03.011.	Randomized Controlled Trial
Inflammatory cytokine profiles during exercise in obese, diabetic, and healthy children	doi: 10.4274/jcrpe.v3i3.23.	No
Effects of exercise and/or diet programs on kinanthropometric and metabolic parameters in obese children: A pilot study	doi: 10.2478/v10078-011-0041-x.	No
Future sport, exercise and physical education professionals' perceptions of the physical self of obese children	doi: 10.1186/s12913-016-1423-5.	No
The effects of an exercise program on anthropometric, metabolic, and cardiovascular parameters in obese children	doi: 10.4070/kcj.2010.40.4.179.	No
Exercise improves the ApoB/ApoA-I ratio, a marker of the metabolic syndrome in obese children	doi: 10.1111/j.1651-2227.2010.01920.x.	Randomized Controlled Trial
Effect of diet and exercise treatment for Obese japanese children on abdominal fat distribution	doi: 10.1080/15438620903423924.	No
Perceptions of exercise in obese school-aged children	doi: 10.1097/JNR.0b013e3181b2554b.	No
Use of session rating of perceived exertion for monitoring resistance exercise in children who are overweight or obese	doi: 10.1123/pes.20.3.333.	No
Exercise alone reduces insulin resistance in obese children independently of changes in body composition	doi: 10.1210/jc.2007-0779.	No
The obese child: Motivation as a tool for exercise	doi: 10.1067/mph.2003.25.	No
Ventilatory efficiency and rate of perceived exertion in obese and non-obese children performing standardized exercise	doi: 10.1046/j.1475-097x.2002.00427.x.	No
Responses of non-obese white children to treadmill exercise	doi: 10.1067/mpd.2001.115968.	No
Inclusion of resistance exercise in a multidisciplinary outpatient treatment program for preadolescent obese children	doi: 10.1097/00007611-199906000-00007.	No
Motivating the obese child to move: The role of structured exercise in pediatric weight management	doi: 10.1097/00007611-199906000-00006.	No
Exercise-induced bronchospasm in nonasthmatic obese children	doi: 10.1177/000992289303200407.	No
Are obese children truly unfit? Minimizing the confounding effect of body size on the exercise response	doi: 10.1016/s0022-3476(05)82878-1.	No
A new diet-exercise therapy in our obese-child clinic.	doi: 10.7888/juoeh.9.215.	No
Cardiorespiratory function during exercise in obese children	doi: 10.1111/j.1651-2227.1987.tb10472.x.	No
Effect of physical exercise on secretion of growth hormone, glucagon, and cortisol in obese and diabetic children	doi: 10.2337/diab.24.8.758.	No
Influence of a physical exercise program in the anxiety and depression in children with obesity	doi: 10.3390/ijerph17134655.	No
Significant effect of information placebo on exercise test results in children with normal weight, overweight and obesity	doi: 10.1111/apa.14959.	Randomized Controlled Trial
Cardiovascular risk profile, oxygen uptake, and perceived exertion rate in children with obesity: The interactive effect of exercise intensity and duration	doi: 10.2147/DMSO.S197642.	No
Efficacy of an exercise intervention among children with comorbid asthma and obesity	doi: 10.1016/j.puhe.2018.02.014.	No
Recovery Responses to Maximal Exercise in Healthy-Weight Children and Children With Obesity	doi: 10.1080/02701367.2017.1407492.	No
Effect of 7 days of exercise on exogenous carbohydrate oxidation and insulin resistance in children with obesity	doi: 10.1139/apnm-2017-0358.	No
Cytokine responses to acute intermittent aerobic exercise in children with prader-willi syndrome and nonsyndromic obesity	doi: 10.1123/pes.2015-0050.	No
Hormonal and metabolic responses to endurance exercise in children with prader-willi syndrome and non-syndromic obesity	doi: 10.1016/j.metabol.2014.11.011.	No
Effects of obstructive sleep apnea and obesity on exercise function in children	doi: 10.5665/sleep.3770.	No
Synergistic effect of obesity and lipid ingestion in suppressing the growth hormone response to exercise in children	doi: 10.1152/japplphysiol.01184.2011.	No
The one year exercise and lifestyle intervention program KLAKS: Effects on anthropometric parameters, cardiometabolic risk factors and glycemic control in childhood obesity	doi: 10.1016/j.metabol.2013.11.016.	No
Impact of strength training exercise on secondary prevention of childhood obesity; an intervention within the school system	doi: 10.3305/nh.2013.28.2.6280.	No
Residual effect of muscle strength exercise in secondary prevention of childhood obesity	doi: 10.3305/nh.2013.28.2.6159.	No
Effect of an individualized physical training program on resting cortisol and growth hormone levels and fat oxidation during exercise in obese children	doi: 10.1016/j.ando.2010.04.002.	Randomized Controlled Trial
Effect of supervised exercise intervention on metabolic risk factors and physical fitness in Chinese obese children in early puberty	doi: 10.1111/j.1467-789X.2007.00455.x.	No
Understanding the potential contribution of a third "T" to FITT exercise prescription: the case of timing in exercise for obesity and cardiometabolic management in children	doi: 10.1139/apnm-2018-0462.	No
Obesity, body image, and its impact on children's eating and exercise behaviors in China: A nationwide longitudinal study	doi: 10.1016/j.ypmed.2017.10.024.	No
Effects of regular exercise on obesity and type 2 diabete mellitus in Korean children: improvements glycemic control and serum adipokines level	doi: 10.1589/jpts.27.1903.	No
Childhood Obesity, Physical Activity, and Exercise	doi: 10.1123/pes.2016-0014.	No
The one year exercise and lifestyle intervention program KLAKS: Effects on anthropometric parameters, cardiometabolic risk factors and glycemic control in childhood obesity.	doi: 10.1016/j.metabol.2013.11.016.	No
Home-exercise Childhood Obesity Intervention: A Randomized Clinical Trial Comparing Print Versus Web-based (Move It) Platforms	doi: 10.1016/j.pedn.2018.04.008.	Randomized Controlled Trial
Transtheoretical Model Based Exercise Counseling Combined with Music Skipping Rope Exercise on Childhood Obesity	doi: 10.1016/j.anr.2016.03.003.	Randomized Controlled Trial
Exercise Training Improved Body Composition,Cardiovascular Function, and Physical Fitness of 5-Year-Old Children With Obesity or Normal Body Mass	doi: 10.1123/pes.2016-0107.	Randomized Controlled Trial
Effects of diet and exercise on obesity-related vascular dysfunction in children	doi: 10.1161/01.CIR.0000126599.47470.BE.	Clinical Trial
Determinants of obesity in the Ulm Research on Metabolism, Exercise and Lifestyle in Children (URMEL-ICE)	doi: 10.1007/s00431-009-1016-y.	Randomized Controlled Trial
Methodology of an exercise intervention program using social incentives and gamification for obese children	doi: 10.1186/s12889-019-6992-x.	Randomized Controlled Trial
Exercise training in overweight and obese children: Recreational football and high-intensity interval training provide similar benefits to physical fitness	doi: 10.1111/sms.13241.	Randomized Controlled Trial
An exercise-based randomized controlled trial on brain, cognition, physical health and mental health in overweight/obese children (ActiveBrains project): Rationale, design and methods	doi: 10.1016/j.cct.2016.02.007.	Randomized Controlled Trial
Prevention of diabetes in overweight/obese children through a family based intervention program including supervised exercise (PREDIKID project): study protocol for a randomized controlled trial	doi: 10.1186/s13063-017-2117-y.	Randomized Controlled Trial
Exercise dose and diabetes risk in overweight and obese children: a randomized controlled trial	doi: 10.1001/2012.jama.10762.	Randomized Controlled Trial
Diet and exercise training restore blood pressure and vasodilatory responses during physiological maneuvers in obese children	doi: 10.1161/01.CIR.0000161959.04675.5A.	Clinical Trial
The effects of resistance exercise training on body composition and strength in obese prepubertal children	doi: 10.3810/psm.2013.09.2028.	Randomized Controlled Trial
The influence of diet and/or exercise and parental compliance on health-related quality of life in obese children	doi: 10.1016/j.nutres.2009.05.007.	Clinical Trial
Exercise training associated with diet improves heart rate recovery and cardiac autonomic nervous system activity in obese children	doi: 10.1055/s-0030-1267158.	Randomized Controlled Trial
Impact of a combined diet and progressive exercise intervention for overweight and obese children: the B.E. H.I.P. study	doi: 10.1139/h11-042.	Randomized Controlled Trial
The effect of exercise on leptin, insulin, cortisol and lipid profiles in obese children	doi: 10.1177/147323000903700523.	Randomized Controlled Trial
Effect of diet and controlled exercise on weight loss in obese children	doi: 10.1016/s0022-3476(85)80506-0.	Clinical Trial
Effects of a twelve-week randomized intervention of exercise and/or diet on weight loss and weight maintenance, and other metabolic parameters in obese preadolescent children	doi: 10.1159/000245931.	Randomized Controlled Trial
Effects of exercise training and its cessation on components of the insulin resistance syndrome in obese children	doi: 10.1038/sj.ijo.0800968.	Clinical Trial
Improvement of early vascular changes and cardiovascular risk factors in obese children after a six-month exercise program	doi: 10.1016/j.jacc.2006.07.035.	Randomized Controlled Trial
Effects of exercise training on vascular function in obese children	doi: 10.1016/j.jpeds.2004.08.078.	Comment
Effect of individualized exercise training combined with diet restriction on inflammatory markers and IGF-1/IGFBP-3 in obese children	doi: 10.1159/000275888.	Randomized Controlled Trial
Weight loss associated with exercise training restores ventilatory efficiency in obese children	doi: 10.1055/s-0029-1233486.	Randomized Controlled Trial
Long-term follow-up of cardiovascular risk factors after exercise training in obese children	doi: 10.3109/17477166.2010.530665.	Randomized Controlled Trial
Effects of a structured exercise program on insulin resistance, inflammatory markers and physical fitness in obese Korean children	doi: 10.1515/jpem.2010.168.	Randomized Controlled Trial
Multicomponent exercise training combined with nutritional counselling improves physical function, biochemical and anthropometric profiles in obese children: A pilot study	doi: 10.1515/jpem.2010.168.	Randomized Controlled Trial
The role of active video-accompanied exercises in improvement of the obese state in children: A prospective study from Turkey	doi: 10.4274/jcrpe.2284.	Clinical Trial
Exercise intervention and cardiovascular risk factors in obese children. Comparison between obese youngsters taking part in a physical activity school-based programme with and without individualised diet counselling: the ACORDA project	doi: 10.3109/03014460.2015.1059889.	Clinical Trial
Short-term heart rate variability in asthmatic obese children: Effect of exhaustive exercise and different humidity conditions	doi: 10.3109/03014460.2015.1059889.	Clinical Trial
Effects of an intensive short-term diet and exercise intervention: Comparison between normal-weight and obese children	doi: 10.1152/ajpregu.00131.2013.	Comparative Study
Metabolic and hormonal consequences of two different meals after a moderate intensity exercise bout in obese prepubertal children	doi: 10.1038/ejcn.2013.86.	Comparative Study
The effects of resistance exercise training on body composition and strength in obese prepubertal children.	doi: 10.3810/psm.2013.09.2028.	Randomized Controlled Trial
A short-term diet and exercise intervention ameliorates inflammation and markers of metabolic health in overweight/obese children	doi: 10.1152/ajpendo.00190.2012.	Clinical Trial
School-based exercise program improves fitness, body composition and cardiovascular risk profile in overweight/obese children	doi: 10.1556/APhysiol.96.2009.3.7.	Clinical Trial
Effects of a Twelvte-week randomized intervention of exercise and/or diet on weight loss and weight maintenance, and other metabolic parameters in obese preadolescent children	doi: 10.1159/000245931.	Randomized Controlled Trial
School-based exercise improves fitness, body composition, insulin sensitivity, and markers of inflammation in non-obese children	doi: 10.1515/jpem.2009.22.5.409.	Controlled Clinical Trial
Exercise and the obese child	doi: 10.1152/japplphysiol.00070.2008.	Review
Effects of an eight-month weight-control program on body composition and lipid oxidation rate during exercise in obese children	doi: 10.1007/BF03346399.	Comparative Study
Weight loss and growth velocity in obese children after very low calorie diet, exercise, and behavior modification	doi: 10.1080/713794562.	Clinical Trial
Effects of exercise combined with diet therapy on protein utilization in obese children	doi: 10.1097/00005768-199903000-00005.	Clinical Trial
Gas exchange during exercise in obese children	doi: 10.1007/BF00441512.	Review
Effects of Exercise on Body Posture, Functional Movement, and Physical Fitness in Children With Overweight/Obesity	doi: 10.1519/JSC.0000000000003655.	Clinical Trial
Exercise training improved body composition, cardiovascular function, and physical fitness of 5-year-old children with obesity or normal body mass	doi: 10.1123/pes.2016-0107.	Randomized Controlled Trial
The response of circulating omentin-1 concentration to 16-week exercise training in male children with obesity	doi: 10.1080/00913847.2016.1248223.	Randomized Controlled Trial
Effects of obesity and gender on exercise capacity in urban children	doi: 10.1016/j.genm.2011.05.005.	Clinical Trial
Feasibility, design and conduct of a pragmatic randomized controlled trial to reduce overweight and obesity in children: The electronic games to aid motivation to exercise (eGAME) study	doi: 10.1186/1471-2458-9-146.	Randomized Controlled Trial
Effects of a controlled trial of a school-based exercise program on the obesity indexes of preschool children	doi: 10.1093/ajcn/68.5.1006.	Clinical Trial
Exercise intervention and cardiovascular risk factors in obese children. Comparison between obese youngsters taking part in a physical activity school-based programme with and without individualised diet counselling: the ACORDA project	doi: 10.3109/03014460.2015.1059889.	Clinical Trial
Impact of a combined diet and progressive exercise intervention for overweight and obese children: the BE HIP study	doi: 10.1139/h11-042.	Randomized Controlled Trial
Effects of Exercise on Plantar Pressure during Walking in Children with Overweight/Obesity	doi: 10.1249/MSS.0000000000002157.	Controlled Clinical Trial
Exergames: the role of ergonomics and design in helping to control childhood obesity through physical and functional exercise program	doi: 10.3233/WOR-2012-0644-1208.	Review
Exercise for Preventing Childhood Obesity	doi: 10.3233/WOR-2012-0644-1208.	Review
Dietitians and exercise professionals in a childhood obesity treatment team	doi: 10.1111/j.1651-2227.2005.tb02125.x.	Review
Exercise as a modality in the treatment of childhood obesity	doi: 10.1016/s0031-3955(05)70353-9.	Review
Effects of a home-exercise programme in childhood survivors of acute lymphoblastic leukaemia on physical fitness and physical functioning: results of a randomised clinical trial	doi: 10.1007/s00520-019-05131-2.	Randomized Controlled Trial
Childhood Pulmonary Function, Exercise Capacity, and Exhaled Nitric Oxide Levels: Outcomes following Neonatal Treatment with Inhaled Nitric Oxide to Prevent Bronchopulmonary Dysplasia	doi: 10.1055/s-0038-1668556.	Randomized Controlled Trial
Can exercise improve reduced right ventricle function in obese children?	doi: 10.1161/HYPERTENSIONAHA.114.04912.	Comparative Study
Enhancing the self-efficacy of childhood cancer survivors to perform physical exercise through adventure-based training	doi: 10.1016/j.ijnurstu.2018.04.007.	Randomized Controlled Trial
The effects of continuous vs intermittent exercise on lipid profile in obese children		Randomized Controlled Trial
Effect of two chronic exercise protocols on pre-atherosclerotic and anti-atherosclerotic biomarkers levels in obese and overweight children		No
Influence of different exercise regimens on segmental body fat in obese primary school children		No
Exercise training lowers serum chemerin concentration in obese children		No
Exercise intervention and cardiovascular risk factors in obese children. Comparison between obese youngsters taking part in a physical activity school-based programme with and without individualised diet counselling: the ACORDA project		No
The effects of continuous vs intermittent exercise on lipid profile in obese children		Randomized Controlled Trial
Self-determined motivation, physical exercise and diet in obese children: A three-year follow-up study		No
A 6-week diet and exercise intervention alters metabolic syndrome risk factors in obese Chinese children aged 11-13 years		Randomized Controlled Trial
Effects of physical exercises and nutritional guidance on the cardiovascular risk profile of obese children		CCT
Ventilatory response to aerobic exercise in obese children		No
Exercise training improves body composition, blood lipid profile and serum insulin levels in obese children		Randomized Controlled Trial
Low-intensity exercise training maintains adipokines in obese children		No
Exercise intolerance in obese children--is it asthma?		No
Supporting food and exercise monitoring for overweight and obese children		No
Effects of nutritional education and physical exercise program on nutritional and health status of obese children in Busan metropolitan city		No
Effects of nutrition education and exercise in obese children: The Ho-Chunk Youth Fitness Program		No
Exercise performance and oxygen uptake efficiency slope in obese children performing standardized exercise.		No
Cardiopulmonary response in obese children using treadmill exercise testing		No
Pulmonary function during exercise in obese children		No
The acute effects of an 8-week diet, exercise, and educational camp program on obese children		No
Exercise induced bronchospasm in asthmatic and non-asthmatic obese children		No
Long-term effects of a lifestyle modification exercise program on the fitness of sedentary, obese children		No
A comparison of lifestyle exercise, aerobic exercise, and calisthenics on weight loss in obese children		No
Adherence to exercise in obese children		No
A comparison of lifestyle change and programmed aerobic exercise on weight and fitness changes in obese children		No
The influence of physical exercise upon the body composition of obese children		No
Studies concerning the importance of physical exercise in prevention and treatment the obesity in children with ASD		No
Exercise strategies for children a public health approach for obesity prevention		No
A long-term aerobic exercise program decreases the obesity index and increases the high density lipoprotein cholesterol concentration in obese children		No
Objective assessment of physical activity during physical exercise sessions in a multidisciplinary intervention for the treatment of childhood obesity		No
Effects of a 3-month exercise and nutrition program for childhood obesity on anthropometrics, physical fitness, and serum lipids		No
AEROBIC INTERVAL EXERCISES VERSUS DIETARY CONTROL INDUCED CHANGES OF ADIPOKINES LEVELS, LIPID PROFILE AND QUALITY OF LIFE IN OVERWEIGHT OR OBESE CHILDREN		Randomized Controlled Trial
ASSESSMENT OF DEPRESSION AND ANXIETY STATES OF OBESE CHILDREN AFTER PARTICIPATING IN AN EXERCISE PROGRAM		No
Exercise Dose and Diabetes Risk in Overweight and Obese Children A Randomized Controlled Trial		Randomized Controlled Trial
Impact of a diet and exercise program for obese children on serum ghrelin levels		No
LONG-TERM EFFECTS OF A LIFE-STYLE MODIFICATION EXERCISE PROGRAM ON THE FITNESS OF SEDENTARY, OBESE CHILDREN		No
Relationship Between Abdominal Adiposity and Exercise Tolerance in Children With Obesity		No
PHYSICAL EXERCISE WITH RECREATIONAL ACTIVITIES: AN ALTERNATIVE FOR THE TREATMENT OF CHILDHOOD OBESITY		No
Childhood obesity and the effect of acute exercise swimming and sweating response for healthy development		No
Effect of aerobic exercise on mood state of simple obesity children		No
Exercise improves arterial inflammation in childhood-onset takayasu arteritis: A randomized controlled trial		Randomized Controlled Trial
Sustained improvements in cardiac function and fitness one year after an exercise intervention in obese children		No
Randomised trial of progressive resistance exercise for childhood Charcot-Marie-Tooth disease		Randomized Controlled Trial
Effect of obesity and lifestyle intervention on cardiac function in children during exercise stress test		No
Influence of exercise on obese children 6-12 years in enugu south local government area of Enugu State, Nigeria		No
Optimal timing of exercise in childhood for bone: Setting the record straight		No
Effects on quality of life of participation in a combined physical exercise and psychosocial intervention program for childhood cancer patients		No

## Sheet: Sheet1
doi: 10.1016/j.clnu.2011.03.011.
doi: 10.1111/j.1651-2227.2010.01920.x.
doi: 10.1111/apa.14959.
doi: 10.1016/j.ando.2010.04.002.
doi: 10.1016/j.pedn.2018.04.008.
doi: 10.1016/j.anr.2016.03.003.
doi: 10.1123/pes.2016-0107.
doi: 10.1007/s00431-009-1016-y.
doi: 10.1186/s12889-019-6992-x.
doi: 10.1111/sms.13241.
doi: 10.1016/j.cct.2016.02.007.
doi: 10.1186/s13063-017-2117-y.
doi: 10.1001/2012.jama.10762.
doi: 10.3810/psm.2013.09.2028.
doi: 10.1590/s0004-27302006000300013.
doi: 10.1055/s-0030-1267158.
doi: 10.1139/h11-042.
doi: 10.1177/147323000903700523.
doi: 10.1159/000245931.
doi: 10.1016/j.jacc.2006.07.035.
doi: 10.1159/000275888.
doi: 10.1055/s-0029-1233486.
doi: 10.3109/17477166.2010.530665.
doi: 10.1515/jpem.2010.168.
doi: 10.1515/jpem.2010.168.
doi: 10.3810/psm.2013.09.2028.
doi: 10.1159/000245931.
doi: 10.1123/pes.2016-0107.
doi: 10.1080/00913847.2016.1248223.
doi: 10.1186/1471-2458-9-146.
doi: 10.1139/h11-042.
doi: 10.1007/s00520-019-05131-2.
doi: 10.1055/s-0038-1668556.
doi: 10.1016/j.ijnurstu.2018.04.007.
